# Supplementary material for: Decomposition mechanisms of trinitroalkyl compounds: a theoretical study from aliphatic to aromatic nitro compounds
Source: Royal Society of Chemistry journal article supplement (doi:10.1039/c3cp54719a), 2014-01-01
Supplement: c3cp54719a1.pdf [file c3cp54719a1.pdf]

**Decomposition mechanisms of trinitroalkyl compounds: a  
theoretical study from aliphatic to aromatic nitro compounds**

Guillaume Fayet, Patricia Rotureau, Benoit Minisini

**SUPPORTING INFORMATION**

**Table S1** – Geometric parameters of trinitromethane

|                                     | Gas Electron Diffraction <sup>1</sup> | X-ray <sup>2</sup> | B3LYP<br>6-311G(d,p)<br>3 | B3LYP<br>6-311++G(d,p)<br>3 | PBE0<br>6-31+G(d,p) |
|-------------------------------------|---------------------------------------|--------------------|---------------------------|-----------------------------|---------------------|
| <i>bond lengths (in Å)</i>          |                                       |                    |                           |                             |                     |
| C–N                                 | 1.505                                 | 1.505              | 1.523                     | 1.526                       | 1.508               |
| N–O1                                | 1.219                                 | 1.205              | 1.213                     | 1.214                       | 1.212               |
| N–O2                                | 1.219                                 | 1.207              | 1.209                     | 1.209                       | 1.208               |
| C–H                                 | 1.13                                  | 0.90               | 1.084                     | 1.085                       | 1.088               |
| <i>angles (in degrees)</i>          |                                       |                    |                           |                             |                     |
| N-C-N                               | 110.7                                 | 108.6              | 109.6                     | 109.8                       | 109.6               |
| N-C-H                               | 108.2                                 | 110.4              | 109.3                     | 109.2                       | 109.3               |
| C-N-O1                              | 115.7                                 | 115.3              | 113.4                     | 113.4                       | 113.4               |
| C-N-O2                              | 115.7                                 | 117.5              | 117.8                     | 118.0                       | 117.9               |
| O1-N-O2                             | 128.6                                 | 127.2              | 128.8                     | 128.6                       | 128.8               |
| <i>dihedral angles (in degrees)</i> |                                       |                    |                           |                             |                     |
| H-C-N-O                             | 26.3                                  | 44                 | 43                        | 42                          | 43.0                |

1 N. I. Sadova, N. I. Popik and L. V. Vilkov, *J. Struct. Chem.*, 1976, **17**, 257-262.

2 H. Schodel, R. Dienelt and H. Bock, *Acta Cryst. C*, 1994, **50**, 1790-1792.

3 M. A. Tafipolsky, I. V. Tokmakov and V. A. Shlyapochnikov, *J. Mol. Struct.*, 1999, **510**, 149-156.

**Table S2** – Main structural parameters of 1,1,1-trinitrobutane ( $n_c=4$ ) and its analogues with different lengths of carbon chain ( $n_c=1-8$ ).

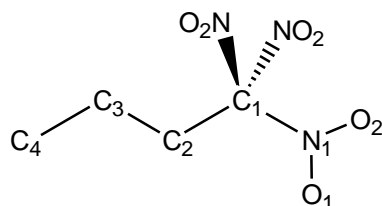

| $n_c$                                                          | 1     | 2     | 3     | 4     | 5     | 6     | 7     | 8     |
|----------------------------------------------------------------|-------|-------|-------|-------|-------|-------|-------|-------|
| Bond lengths (Å)                                               |       |       |       |       |       |       |       |       |
| N <sub>1</sub> -O <sub>1</sub>                                 | 1.212 | 1.212 | 1.213 | 1.213 | 1.213 | 1.214 | 1.214 | 1.214 |
| N <sub>1</sub> -O <sub>2</sub>                                 | 1.208 | 1.209 | 1.207 | 1.207 | 1.207 | 1.207 | 1.207 | 1.207 |
| N <sub>1</sub> -C <sub>1</sub>                                 | 1.508 | 1.529 | 1.532 | 1.532 | 1.532 | 1.531 | 1.532 | 1.532 |
| C <sub>1</sub> -C <sub>2</sub>                                 | N.A.  | 1.497 | 1.515 | 1.514 | 1.513 | 1.513 | 1.513 | 1.513 |
| Angles (°)                                                     |       |       |       |       |       |       |       |       |
| O <sub>1</sub> -N <sub>1</sub> -C <sub>1</sub>                 | 113.4 | 114.6 | 113.9 | 113.8 | 113.8 | 113.8 | 113.8 | 113.8 |
| O <sub>2</sub> -N <sub>1</sub> -C <sub>1</sub>                 | 117.9 | 117.4 | 118.5 | 118.2 | 118.2 | 118.2 | 118.2 | 118.2 |
| N <sub>1</sub> -C <sub>1</sub> -C <sub>2</sub>                 | N.A.  | 112.2 | 111.1 | 111.2 | 111.2 | 111.3 | 111.2 | 111.2 |
| Dihedral angles (°)                                            |       |       |       |       |       |       |       |       |
| O <sub>1</sub> -N <sub>1</sub> -C <sub>1</sub> -C <sub>2</sub> | N.A.  | 43.3  | 46.7  | 47.4  | 47.5  | 47.6  | 47.8  | 47.8  |

**Table S3** – Main structural parameters of the radical issued from the C-N breaking (**Rad1**) in 1,1,1-trinitrobutane ( $n_c=4$ ) and its analogues with different lengths of carbon chain ( $n_c=1-8$ ).

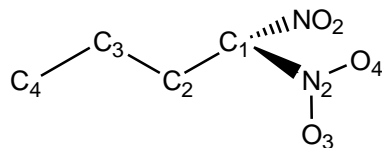

| $n_c$                                                          | <b>1</b> | <b>2</b> | <b>3</b> | <b>4</b> | <b>5</b> | <b>6</b> | <b>7</b> | <b>8</b> |
|----------------------------------------------------------------|----------|----------|----------|----------|----------|----------|----------|----------|
| Bond lengths (Å)                                               |          |          |          |          |          |          |          |          |
| N <sub>2</sub> -O <sub>3</sub>                                 | 1.225    | 1.226    | 1.225    | 1.225    | 1.225    | 1.225    | 1.225    | 1.225    |
| N <sub>2</sub> -O <sub>4</sub>                                 | 1.216    | 1.221    | 1.219    | 1.218    | 1.219    | 1.219    | 1.219    | 1.219    |
| N <sub>2</sub> -C <sub>1</sub>                                 | 1.425    | 1.432    | 1.435    | 1.436    | 1.435    | 1.435    | 1.435    | 1.435    |
| C <sub>1</sub> -C <sub>2</sub>                                 | N.A.     | 1.468    | 1.474    | 1.471    | 1.471    | 1.471    | 1.471    | 1.471    |
| Angles (°)                                                     |          |          |          |          |          |          |          |          |
| O <sub>3</sub> -N <sub>2</sub> -C <sub>1</sub>                 | 113.9    | 115.3    | 115.5    | 115.5    | 115.6    | 115.6    | 115.6    | 115.6    |
| O <sub>4</sub> -N <sub>2</sub> -C <sub>1</sub>                 | 118.9    | 118.2    | 118.0    | 118.0    | 118.0    | 118.0    | 118.0    | 118.0    |
| N <sub>2</sub> -C <sub>1</sub> -C <sub>2</sub>                 | N.A.     | 121.7    | 122.2    | 122.0    | 122.1    | 122.1    | 122.1    | 122.1    |
| N <sub>1</sub> -C <sub>2</sub> -C <sub>3</sub>                 | N.A.     | N.A.     | 112.7    | 112.9    | 112.7    | 112.7    | 112.7    | 112.7    |
| Dihedral angles (°)                                            |          |          |          |          |          |          |          |          |
| O <sub>3</sub> -N <sub>2</sub> -C <sub>1</sub> -C <sub>2</sub> | N.A.     | 20.6     | 30.2     | 31.6     | 30.0     | 30.1     | 29.9     | 29.4     |
| N <sub>2</sub> -C <sub>1</sub> -C <sub>2</sub> -C <sub>3</sub> | N.A.     | N.A.     | -101.9   | -99.7    | -99.9    | -100.0   | -99.5    | -99.1    |

**Table S4** – Main structural parameters of the transition state issued from the HONO elimination mechanism (**TS2**) in 1,1,1-trinitrobutane ( $n_c=4$ ) and its analogues with different lengths of carbon chain ( $n_c=1-8$ ).

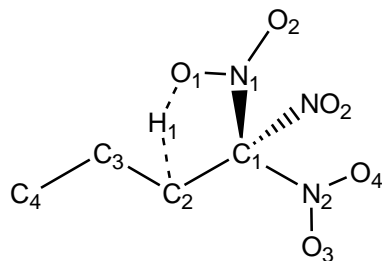

| $n_c$                                                          | 1    | 2     | 3     | 4     | 5     | 6     | 7     | 8     |
|----------------------------------------------------------------|------|-------|-------|-------|-------|-------|-------|-------|
| Bond lengths (Å)                                               |      |       |       |       |       |       |       |       |
| N <sub>1</sub> -O <sub>1</sub>                                 | N.A. | 1.260 | 1.257 | 1.257 | 1.257 | 1.257 | 1.257 | 1.257 |
| N <sub>1</sub> -O <sub>2</sub>                                 | N.A. | 1.188 | 1.189 | 1.190 | 1.190 | 1.190 | 1.190 | 1.190 |
| N <sub>1</sub> -C <sub>1</sub>                                 | N.A. | 2.067 | 2.092 | 2.096 | 2.095 | 2.096 | 2.095 | 2.096 |
| C <sub>1</sub> -C <sub>2</sub>                                 | N.A. | 1.381 | 1.387 | 1.386 | 1.386 | 1.386 | 1.386 | 1.386 |
| C <sub>2</sub> -H <sub>1</sub>                                 | N.A. | 1.423 | 1.386 | 1.388 | 1.387 | 1.386 | 1.386 | 1.386 |
| Angles (°)                                                     |      |       |       |       |       |       |       |       |
| O <sub>1</sub> -N <sub>1</sub> -C <sub>1</sub>                 | N.A. | 101.8 | 101.1 | 101.0 | 101.0 | 101.0 | 101.0 | 101.0 |
| N <sub>1</sub> -O <sub>1</sub> -H <sub>1</sub>                 | N.A. | 96.3  | 95.5  | 95.5  | 95.5  | 95.5  | 95.5  | 95.4  |
| O <sub>2</sub> -N <sub>1</sub> -C <sub>1</sub>                 | N.A. | 134.7 | 135.2 | 135.4 | 135.3 | 135.3 | 135.3 | 135.4 |
| C <sub>1</sub> -C <sub>2</sub> -H <sub>1</sub>                 | N.A. | 90.8  | 89.9  | 90.0  | 90.0  | 90.0  | 90.0  | 90.0  |
| C <sub>1</sub> -C <sub>2</sub> -C <sub>3</sub>                 | N.A. | N.A.  | 122.2 | 122.6 | 122.6 | 122.6 | 122.6 | 122.6 |
| N <sub>2</sub> -C <sub>1</sub> -C <sub>2</sub>                 | N.A. | 122.0 | 121.9 | 122.0 | 121.9 | 122.0 | 122.0 | 122.0 |
| Dihedral angles (°)                                            |      |       |       |       |       |       |       |       |
| O <sub>1</sub> -N <sub>1</sub> -C <sub>1</sub> -C <sub>2</sub> | N.A. | -0.5  | 0.3   | 0.1   | 0.1   | -0.0  | -0.1  | -0.1  |
| O <sub>3</sub> -N <sub>2</sub> -C <sub>1</sub> -C <sub>2</sub> | N.A. | -2.5  | -9.8  | -10.4 | -10.5 | -10.7 | -10.8 | -10.9 |
| N <sub>1</sub> -C <sub>1</sub> -C <sub>2</sub> -C <sub>3</sub> | N.A. | N.A.  | 107.4 | 107.5 | 107.4 | 107.5 | 107.5 | 107.5 |

**Table S5** – Main structural parameters of the product issued from the HONO elimination mechanism (**Prod1**) in 1,1,1-trinitrobutane ( $n_c=4$ ) and its analogues with different lengths of carbon chain ( $n_c=1-8$ ).

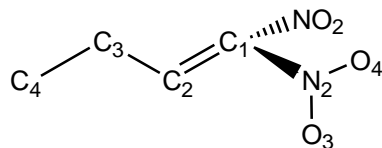

| $n_c$                                                          | <b>1</b> | <b>2</b> | <b>3</b> | <b>4</b> | <b>5</b> | <b>6</b> | <b>7</b> | <b>8</b> |
|----------------------------------------------------------------|----------|----------|----------|----------|----------|----------|----------|----------|
| Bond lengths (Å)                                               |          |          |          |          |          |          |          |          |
| N <sub>2</sub> -O <sub>3</sub>                                 | N.A.     | 1.218    | 1.219    | 1.219    | 1.219    | 1.219    | 1.219    | 1.219    |
| N <sub>2</sub> -O <sub>4</sub>                                 | N.A.     | 1.214    | 1.216    | 1.217    | 1.217    | 1.217    | 1.217    | 1.217    |
| N <sub>2</sub> -C <sub>1</sub>                                 | N.A.     | 1.467    | 1.461    | 1.461    | 1.460    | 1.460    | 1.460    | 1.460    |
| C <sub>1</sub> -C <sub>2</sub>                                 | N.A.     | 1.323    | 1.331    | 1.331    | 1.331    | 1.331    | 1.331    | 1.331    |
| Angles (°)                                                     |          |          |          |          |          |          |          |          |
| O <sub>3</sub> -N <sub>2</sub> -C <sub>1</sub>                 | N.A.     | 116.5    | 116.9    | 117.0    | 117.0    | 117.0    | 117.0    | 117.0    |
| O <sub>4</sub> -N <sub>2</sub> -C <sub>1</sub>                 | N.A.     | 116.4    | 116.7    | 116.7    | 116.7    | 116.7    | 116.7    | 116.7    |
| N <sub>2</sub> -C <sub>1</sub> -C <sub>2</sub>                 | N.A.     | 122.3    | 122.3    | 122.4    | 122.5    | 122.5    | 122.5    | 122.5    |
| N <sub>1</sub> -C <sub>2</sub> -C <sub>3</sub>                 | N.A.     | N.A.     | 127.0    | 127.3    | 127.2    | 127.2    | 127.3    | 127.2    |
| Dihedral angles (°)                                            |          |          |          |          |          |          |          |          |
| O <sub>3</sub> -N <sub>2</sub> -C <sub>1</sub> -C <sub>2</sub> | N.A.     | 32.6     | 13.3     | 13.2     | 12.3     | 12.3     | 12.5     | 12.2     |
| N <sub>2</sub> -C <sub>1</sub> -C <sub>2</sub> -C <sub>3</sub> | N.A.     | N.A.     | 177.9    | 178.1    | 178.6    | 178.6    | 178.6    | 178.8    |

**Table S6** – Main structural parameters of 1,1,1-trinitrobutane and its analogues with double bonds (**1=2**, **2=3** and **1=2=3**).



|                                                                | <b>1,1,1-trinitrobutane</b> | <b>1=2</b> | <b>2=3</b> | <b>1=2=3</b> |
|----------------------------------------------------------------|-----------------------------|------------|------------|--------------|
| Bond lengths (Å)                                               |                             |            |            |              |
| N <sub>1</sub> -O <sub>1</sub>                                 | 1.213                       | 1.214      | 1.212      | 1.212        |
| N <sub>1</sub> -O <sub>2</sub>                                 | 1.207                       | 1.206      | 1.207      | 1.207        |
| N <sub>1</sub> -C <sub>1</sub>                                 | 1.532                       | 1.530      | 1.538      | 1.533        |
| C <sub>1</sub> -C <sub>2</sub>                                 | 1.514                       | 1.520      | 1.477      | 1.480        |
| Angles (°)                                                     |                             |            |            |              |
| O <sub>1</sub> -N <sub>1</sub> -C <sub>1</sub>                 | 113.8                       | 113.8      | 114.5      | 114.6        |
| O <sub>2</sub> -N <sub>1</sub> -C <sub>1</sub>                 | 118.2                       | 118.2      | 117.5      | 117.3        |
| N <sub>1</sub> -C <sub>1</sub> -C <sub>2</sub>                 | 111.2                       | 111.1      | 112.1      | 111.6        |
| Dihedral angles (°)                                            |                             |            |            |              |
| O <sub>1</sub> -N <sub>1</sub> -C <sub>1</sub> -C <sub>2</sub> | 47.4                        | 46.7       | 41.6       | 42.1         |

**Table S7** – Main structural parameters of the radical issued from the C-N breaking (**Rad1**) in 1,1,1-trinitrobutane and its analogues with double bonds (**1=2**, **2=3** and **1=2=3**).



|                                                                | <b>1,1,1-trinitrobutane</b> | <b>1=2</b> | <b>2=3</b> | <b>1=2=3</b> |
|----------------------------------------------------------------|-----------------------------|------------|------------|--------------|
| Bond lengths (Å)                                               |                             |            |            |              |
| N <sub>2</sub> -O <sub>3</sub>                                 | 1.225                       | 1.224      | 1.225      | 1.226        |
| N <sub>2</sub> -O <sub>4</sub>                                 | 1.218                       | 1.218      | 1.221      | 1.223        |
| N <sub>2</sub> -C <sub>1</sub>                                 | 1.436                       | 1.437      | 1.438      | 1.429        |
| C <sub>1</sub> -C <sub>2</sub>                                 | 1.471                       | 1.479      | 1.386      | 1.395        |
| Angles (°)                                                     |                             |            |            |              |
| O <sub>3</sub> -N <sub>2</sub> -C <sub>1</sub>                 | 115.5                       | 115.8      | 116.7      | 116.6        |
| O <sub>4</sub> -N <sub>2</sub> -C <sub>1</sub>                 | 118.0                       | 117.6      | 117.3      | 117.3        |
| N <sub>2</sub> -C <sub>1</sub> -C <sub>2</sub>                 | 122.0                       | 122.0      | 121.7      | 122.0        |
| N <sub>1</sub> -C <sub>2</sub> -C <sub>3</sub>                 | 112.9                       | 111.0      | 126.1      | 124.3        |
| Dihedral angles (°)                                            |                             |            |            |              |
| O <sub>3</sub> -N <sub>2</sub> -C <sub>1</sub> -C <sub>2</sub> | 31.6                        | 33.8       | 13.3       | 8.7          |
| N <sub>2</sub> -C <sub>1</sub> -C <sub>2</sub> -C <sub>3</sub> | -99.7                       | -111.9     | 177.6      | 179.5        |



**Table S8** – Main structural parameters of the transition state issued from the HONO elimination mechanism (**TS2**) in 1,1,1-trinitrobutane and its analogues with double bonds (**1=2**, **2=3** and **1=2=3**).



|                                                                | <b>1,1,1-trinitrobutane</b> | <b>1=2</b> | <b>2=3</b> | <b>1=2=3</b> |
|----------------------------------------------------------------|-----------------------------|------------|------------|--------------|
| Bond lengths (Å)                                               |                             |            |            |              |
| N <sub>1</sub> -O <sub>1</sub>                                 | 1.257                       | 1.253      | 1.266      | 1.265        |
| N <sub>1</sub> -O <sub>2</sub>                                 | 1.190                       | 1.188      | 1.188      | 1.184        |
| N <sub>1</sub> -C <sub>1</sub>                                 | 2.096                       | 2.033      | 2.136      | 2.025        |
| C <sub>1</sub> -C <sub>2</sub>                                 | 1.386                       | 1.399      | 1.358      | 1.368        |
| C <sub>2</sub> -H <sub>1</sub>                                 | 1.388                       | 1.381      | 1.432      | 1.459        |
| Angles (°)                                                     |                             |            |            |              |
| O <sub>1</sub> -N <sub>1</sub> -C <sub>1</sub>                 | 101.0                       | 102.4      | 101.3      | 103.7        |
| N <sub>1</sub> -O <sub>1</sub> -H <sub>1</sub>                 | 95.5                        | 95.5       | 96.4       | 97.0         |
| O <sub>2</sub> -N <sub>1</sub> -C <sub>1</sub>                 | 135.4                       | 133.0      | 136.1      | 132.9        |
| C <sub>1</sub> -C <sub>2</sub> -H <sub>1</sub>                 | 90.0                        | 89.6       | 93.8       | 93.2         |
| C <sub>1</sub> -C <sub>2</sub> -C <sub>3</sub>                 | 122.6                       | 123.1      | 145.2      | 147.4        |
| N <sub>2</sub> -C <sub>1</sub> -C <sub>2</sub>                 | 122.0                       | 120.7      | 123.6      | 122.6        |
| Dihedral angles (°)                                            |                             |            |            |              |
| O <sub>1</sub> -N <sub>1</sub> -C <sub>1</sub> -C <sub>2</sub> | 0.1                         | 1.0        | -2.1       | -2.0         |
| O <sub>3</sub> -N <sub>2</sub> -C <sub>1</sub> -C <sub>2</sub> | -10.4                       | -9.0       | -2.1       | -1.8         |
| N <sub>1</sub> -C <sub>1</sub> -C <sub>2</sub> -C <sub>3</sub> | 107.5                       | -153.6     | 180.0      | -177.8       |

**Table S9** – Main structural parameters of the product issued from the HONO elimination mechanism (**Prod1**) in 1,1,1-trinitrobutane and its analogues with double bonds (**1=2**, **2=3** and **1=2=3**).



|                                                                | <b>1,1,1-trinitrobutane</b> | <b>1=2</b> | <b>2=3</b> | <b>1=2=3</b> |
|----------------------------------------------------------------|-----------------------------|------------|------------|--------------|
| Bond lengths (Å)                                               |                             |            |            |              |
| N <sub>2</sub> -O <sub>3</sub>                                 | 1.219                       | 1.221      | 1.217      | 1.217        |
| N <sub>2</sub> -O <sub>4</sub>                                 | 1.217                       | 1.217      | 1.214      | 1.215        |
| N <sub>2</sub> -C <sub>1</sub>                                 | 1.461                       | 1.456      | 1.472      | 1.468        |
| C <sub>1</sub> -C <sub>2</sub>                                 | 1.331                       | 1.341      | 1.305      | 1.313        |
| Angles (°)                                                     |                             |            |            |              |
| O <sub>3</sub> -N <sub>2</sub> -C <sub>1</sub>                 | 117.0                       | 116.8      | 116.6      | 116.6        |
| O <sub>4</sub> -N <sub>2</sub> -C <sub>1</sub>                 | 116.7                       | 116.9      | 116.5      | 116.4        |
| N <sub>2</sub> -C <sub>1</sub> -C <sub>2</sub>                 | 122.4                       | 121.5      | 122.1      | 122.0        |
| N <sub>1</sub> -C <sub>2</sub> -C <sub>3</sub>                 | 127.3                       | 127.1      | 179.8      | 180.0        |
| Dihedral angles (°)                                            |                             |            |            |              |
| O <sub>3</sub> -N <sub>2</sub> -C <sub>1</sub> -C <sub>2</sub> | 13.2                        | 15.7       | 32.0       | 32.5         |
| N <sub>2</sub> -C <sub>1</sub> -C <sub>2</sub> -C <sub>3</sub> | 178.1                       | 177.6      | -121.8     | -118.8       |

**Table S10** – Main structural parameters of 1,1,1-trinitrobutane (-H) and its analogues by substitution on carbon 2 (-CH<sub>3</sub>, -Cl, -CN, -NH<sub>2</sub>, -NO<sub>2</sub>, -OH).



|                                                                | -H    | -CH <sub>3</sub> | -Cl   | -CN   | -NH <sub>2</sub> | -NO <sub>2</sub> | OH    |
|----------------------------------------------------------------|-------|------------------|-------|-------|------------------|------------------|-------|
| Bond lengths (Å)                                               |       |                  |       |       |                  |                  |       |
| N <sub>1</sub> -O <sub>1</sub>                                 | 1.213 | 1.209            | 1.208 | 1.209 | 1.212            | 1.210            | 1.216 |
| N <sub>1</sub> -O <sub>2</sub>                                 | 1.207 | 1.210            | 1.210 | 1.208 | 1.209            | 1.208            | 1.207 |
| N <sub>1</sub> -C <sub>1</sub>                                 | 1.532 | 1.542            | 1.541 | 1.537 | 1.536            | 1.536            | 1.534 |
| C <sub>1</sub> -C <sub>2</sub>                                 | 1.514 | 1.532            | 1.534 | 1.536 | 1.550            | 1.530            | 1.553 |
| Angles (°)                                                     |       |                  |       |       |                  |                  |       |
| O <sub>1</sub> -N <sub>1</sub> -C <sub>1</sub>                 | 113.8 | 117.2            | 117.2 | 115.9 | 116.7            | 115.6            | 116.3 |
| O <sub>2</sub> -N <sub>1</sub> -C <sub>1</sub>                 | 118.2 | 115.1            | 114.7 | 115.7 | 115.9            | 116.1            | 116.5 |
| N <sub>1</sub> -C <sub>1</sub> -C <sub>2</sub>                 | 111.2 | 113.7            | 113.3 | 112.4 | 111.9            | 112.0            | 111.5 |
| Dihedral angles (°)                                            |       |                  |       |       |                  |                  |       |
| O <sub>1</sub> -N <sub>1</sub> -C <sub>1</sub> -C <sub>2</sub> | 47.4  | 15.0             | 14.1  | 25.8  | 19.0             | 29.0             | 23.4  |

**Table S11** – Main structural parameters of the radical issued from the C-N breaking (**Rad1**) in 1,1,1-trinitrobutane (**-H**) and its analogues by substitution on carbon 2 (**-CH<sub>3</sub>**, **-Cl**, **-CN**, **-NH<sub>2</sub>**, **-NO<sub>2</sub>**, **-OH**).

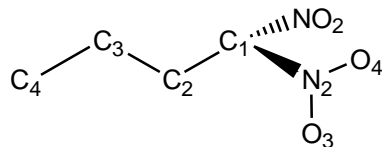

|                                                                | <b>-H</b> | <b>-CH<sub>3</sub></b> | <b>-Cl</b> | <b>-CN</b> | <b>-NH<sub>2</sub></b> | <b>-NO<sub>2</sub></b> | <b>OH</b> |
|----------------------------------------------------------------|-----------|------------------------|------------|------------|------------------------|------------------------|-----------|
| Bond lengths (Å)                                               |           |                        |            |            |                        |                        |           |
| N <sub>2</sub> -O <sub>3</sub>                                 | 1.225     | 1.219                  | 1.219      | 1.220      | 1.223                  | 1.219                  | 1.230     |
| N <sub>2</sub> -O <sub>4</sub>                                 | 1.218     | 1.215                  | 1.212      | 1.212      | 1.213                  | 1.211                  | 1.214     |
| N <sub>2</sub> -C <sub>1</sub>                                 | 1.436     | 1.450                  | 1.448      | 1.446      | 1.441                  | 1.448                  | 1.432     |
| C <sub>1</sub> -C <sub>2</sub>                                 | 1.471     | 1.480                  | 1.479      | 1.486      | 1.493                  | 1.477                  | 1.500     |
| Angles (°)                                                     |           |                        |            |            |                        |                        |           |
| O <sub>3</sub> -N <sub>2</sub> -C <sub>1</sub>                 | 115.5     | 115.9                  | 115.6      | 115.2      | 115.0                  | 115.7                  | 114.9     |
| O <sub>4</sub> -N <sub>2</sub> -C <sub>1</sub>                 | 118.0     | 117.1                  | 116.9      | 117.2      | 118.0                  | 116.8                  | 118.7     |
| N <sub>2</sub> -C <sub>1</sub> -C <sub>2</sub>                 | 122.0     | 121.5                  | 122.0      | 122.3      | 121.0                  | 123.6                  | 121.5     |
| N <sub>1</sub> -C <sub>2</sub> -C <sub>3</sub>                 | 112.9     | 110.0                  | 114.1      | 112.2      | 110.4                  | 115.6                  | 110.8     |
| Dihedral angles (°)                                            |           |                        |            |            |                        |                        |           |
| O <sub>3</sub> -N <sub>2</sub> -C <sub>1</sub> -C <sub>2</sub> | 31.6      | 62.7                   | 60.4       | 52.6       | 51.1                   | 62.1                   | 37.1      |
| N <sub>2</sub> -C <sub>1</sub> -C <sub>2</sub> -C <sub>3</sub> | -99.7     | -94.8                  | -73.4      | -90.6      | -104.1                 | -53.3                  | -100.3    |

**Table S12** – Main structural parameters of the transition state issued from the HONO elimination mechanism (**TS2**) in 1,1,1-trinitrobutane (**-H**) and its analogues by substitution on carbon 2 (**-CH<sub>3</sub>**, **-Cl**, **-CN**, **-NH<sub>2</sub>**, **-NO<sub>2</sub>**, **-OH**).



|                                                                | <b>-H</b> | <b>-CH<sub>3</sub></b> | <b>-Cl</b> | <b>-CN</b> | <b>-NH<sub>2</sub></b> | <b>-NO<sub>2</sub></b> | <b>OH</b> |
|----------------------------------------------------------------|-----------|------------------------|------------|------------|------------------------|------------------------|-----------|
| <b>Bond lengths (Å)</b>                                        |           |                        |            |            |                        |                        |           |
| N <sub>1</sub> -O <sub>1</sub>                                 | 1.257     | 1.256                  | 1.257      | 1.261      | 1.244                  | 1.269                  | 1.243     |
| N <sub>1</sub> -O <sub>2</sub>                                 | 1.190     | 1.190                  | 1.187      | 1.183      | 1.193                  | 1.178                  | 1.192     |
| N <sub>1</sub> -C <sub>1</sub>                                 | 2.096     | 2.090                  | 2.055      | 1.953      | 2.127                  | 1.887                  | 2.115     |
| C <sub>1</sub> -C <sub>2</sub>                                 | 1.386     | 1.401                  | 1.407      | 1.167      | 1.423                  | 1.414                  | 1.424     |
| C <sub>2</sub> -H <sub>1</sub>                                 | 1.388     | 1.371                  | 1.405      | 1.471      | 1.303                  | 1.554                  | 1.323     |
| <b>Angles (°)</b>                                              |           |                        |            |            |                        |                        |           |
| O <sub>1</sub> -N <sub>1</sub> -C <sub>1</sub>                 | 101.0     | 101.8                  | 102.1      | 104.2      | 101.3                  | 105.2                  | 101.4     |
| N <sub>1</sub> -O <sub>1</sub> -H <sub>1</sub>                 | 95.5      | 94.7                   | 95.5       | 96.1       | 94.0                   | 97.2                   | 94.7      |
| O <sub>2</sub> -N <sub>1</sub> -C <sub>1</sub>                 | 135.4     | 135.2                  | 134.0      | 131.6      | 133.7                  | 131.6                  | 133.3     |
| C <sub>1</sub> -C <sub>2</sub> -H <sub>1</sub>                 | 90.0      | 88.7                   | 89.4       | 88.0       | 88.7                   | 86.3                   | 89.0      |
| C <sub>1</sub> -C <sub>2</sub> -C <sub>3</sub>                 | 122.6     | 122.6                  | 124.8      | 119.4      | 117.2                  | 125.3                  | 120.0     |
| N <sub>2</sub> -C <sub>1</sub> -C <sub>2</sub>                 | 122.0     | 118.4                  | 120.2      | 122.4      | 125.9                  | 122.1                  | 124.7     |
| <b>Dihedral angles (°)</b>                                     |           |                        |            |            |                        |                        |           |
| O <sub>1</sub> -N <sub>1</sub> -C <sub>1</sub> -C <sub>2</sub> | 0.1       | -1.6                   | -5.1       | -1.4       | -7.4                   | -7.5                   | -9.2      |
| O <sub>3</sub> -N <sub>2</sub> -C <sub>1</sub> -C <sub>2</sub> | -10.4     | 76.4                   | 76.5       | -45.0      | -22.0                  | -47.6                  | -17.6     |
| N <sub>1</sub> -C <sub>1</sub> -C <sub>2</sub> -C <sub>3</sub> | 107.5     | 110.3                  | 117.0      | 104.7      | 112.0                  | 120.8                  | 115.1     |

**Table S13** – Main structural parameters of the product issued from the HONO elimination mechanism (**Prod1**) in 1,1,1-trinitrobutane (**-H**) and its analogues by substitution on carbon 2 (**-CH<sub>3</sub>**, **-Cl**, **-CN**, **-NH<sub>2</sub>**, **-NO<sub>2</sub>**, **-OH**).

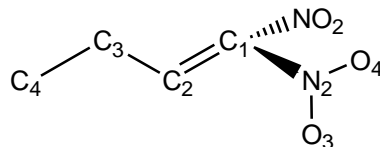

|                                                                | <b>-H</b> | <b>-CH<sub>3</sub></b> | <b>-Cl</b> | <b>-CN</b> | <b>-NH<sub>2</sub></b> | <b>-NO<sub>2</sub></b> | <b>OH</b>    |
|----------------------------------------------------------------|-----------|------------------------|------------|------------|------------------------|------------------------|--------------|
| Bond lengths (Å)                                               |           |                        |            |            |                        |                        |              |
| N <sub>2</sub> -O <sub>3</sub>                                 | 1.219     | 1.221                  | 1.214      | 1.216      | 1.244                  | 1.215                  | 1.256        |
| N <sub>2</sub> -O <sub>4</sub>                                 | 1.217     | 1.219                  | 1.215      | 1.217      | 1.218                  | 1.215                  | 1.210        |
| N <sub>2</sub> -C <sub>1</sub>                                 | 1.461     | 1.453                  | 1.473      | 1.457      | 1.416                  | 1.465                  | 1.416        |
| C <sub>1</sub> -C <sub>2</sub>                                 | 1.331     | 1.344                  | 1.344      | 1.341      | 1.385                  | 1.333                  | 1.385        |
| Angles (°)                                                     |           |                        |            |            |                        |                        |              |
| O <sub>3</sub> -N <sub>2</sub> -C <sub>1</sub>                 | 117.0     | 117.6                  | 117.0      | 116.9      | 117.3                  | 117.0                  | <b>116.5</b> |
| O <sub>4</sub> -N <sub>2</sub> -C <sub>1</sub>                 | 116.7     | 116.5                  | 115.7      | 116.1      | 119.2                  | 115.7                  | 120.5        |
| N <sub>2</sub> -C <sub>1</sub> -C <sub>2</sub>                 | 122.4     | 125.7                  | 122.5      | 126.1      | 124.8                  | 125.1                  | 122.7        |
| N <sub>1</sub> -C <sub>2</sub> -C <sub>3</sub>                 | 127.3     | 121.3                  | 127.9      | 123.3      | 121.9                  | 128.6                  | 123.8        |
| Dihedral angles (°)                                            |           |                        |            |            |                        |                        |              |
| O <sub>3</sub> -N <sub>2</sub> -C <sub>1</sub> -C <sub>2</sub> | 13.2      | -27.7                  | -77.1      | -12.2      | 7.5                    | -33.9                  | -5.4         |
| N <sub>2</sub> -C <sub>1</sub> -C <sub>2</sub> -C <sub>3</sub> | 178.1     | -178.5                 | 179.6      | -177.4     | -179.9                 | -179.3                 | -177.4       |

**Table S14** – Main structural parameters of 1,1,1-trinitrobutane (-H) and its analogues by substitution on carbon 3 (-CH<sub>3</sub>, -Cl, -CN, -NH<sub>2</sub>, -NO<sub>2</sub>, -OH).



|                                                                | -H    | -CH <sub>3</sub> | -Cl   | -CN   | -NH <sub>2</sub> | -NO <sub>2</sub> | OH    |
|----------------------------------------------------------------|-------|------------------|-------|-------|------------------|------------------|-------|
| Bond lengths (Å)                                               |       |                  |       |       |                  |                  |       |
| N <sub>1</sub> -O <sub>1</sub>                                 | 1.213 | 1.215            | 1.214 | 1.214 | 1.214            | 1.210            | 1.214 |
| N <sub>1</sub> -O <sub>2</sub>                                 | 1.207 | 1.205            | 1.205 | 1.205 | 1.206            | 1.209            | 1.206 |
| N <sub>1</sub> -C <sub>1</sub>                                 | 1.532 | 1.537            | 1.538 | 1.535 | 1.536            | 1.534            | 1.535 |
| C <sub>1</sub> -C <sub>2</sub>                                 | 1.514 | 1.518            | 1.523 | 1.519 | 1.516            | 1.511            | 1.515 |
| Angles (°)                                                     |       |                  |       |       |                  |                  |       |
| O <sub>1</sub> -N <sub>1</sub> -C <sub>1</sub>                 | 113.8 | 113.4            | 113.5 | 113.5 | 113.5            | 114.9            | 113.6 |
| O <sub>2</sub> -N <sub>1</sub> -C <sub>1</sub>                 | 118.2 | 118.6            | 118.5 | 118.3 | 118.6            | 117.0            | 118.4 |
| N <sub>1</sub> -C <sub>1</sub> -C <sub>2</sub>                 | 111.2 | 111.0            | 110.4 | 110.5 | 109.8            | 110.1            | 110.5 |
| Dihedral angles (°)                                            |       |                  |       |       |                  |                  |       |
| O <sub>1</sub> -N <sub>1</sub> -C <sub>1</sub> -C <sub>2</sub> | 47.4  | 46.5             | 48.0  | 46.3  | 54.2             | 42.4             | 50.9  |

**Table S15** – Main structural parameters of the radical issued from the C-N breaking (**Rad1**) in 1,1,1-trinitrobutane (**-H**) and its analogues by substitution on carbon 3 (**-CH<sub>3</sub>**, **-Cl**, **-CN**, **-NH<sub>2</sub>**, **-NO<sub>2</sub>**, **-OH**).



|                                                                | <b>-H</b> | <b>-CH<sub>3</sub></b> | <b>-Cl</b> | <b>-CN</b> | <b>-NH<sub>2</sub></b> | <b>-NO<sub>2</sub></b> | <b>OH</b> |
|----------------------------------------------------------------|-----------|------------------------|------------|------------|------------------------|------------------------|-----------|
| Bond lengths (Å)                                               |           |                        |            |            |                        |                        |           |
| N <sub>2</sub> -O <sub>3</sub>                                 | 1.225     | 1.225                  | 1.222      | 1.222      | 1.226                  | 1.223                  | 1.228     |
| N <sub>2</sub> -O <sub>4</sub>                                 | 1.218     | 1.221                  | 1.219      | 1.218      | 1.219                  | 1.218                  | 1.217     |
| N <sub>2</sub> -C <sub>1</sub>                                 | 1.436     | 1.433                  | 1.439      | 1.441      | 1.437                  | 1.440                  | 1.436     |
| C <sub>1</sub> -C <sub>2</sub>                                 | 1.471     | 1.471                  | 1.476      | 1.477      | 1.477                  | 1.477                  | 1.468     |
| Angles (°)                                                     |           |                        |            |            |                        |                        |           |
| O <sub>3</sub> -N <sub>2</sub> -C <sub>1</sub>                 | 115.5     | 116.0                  | 115.9      | 115.6      | 115.8                  | 115.5                  | 115.6     |
| O <sub>4</sub> -N <sub>2</sub> -C <sub>1</sub>                 | 118.0     | 117.7                  | 117.4      | 117.5      | 118.0                  | 117.8                  | 118.2     |
| N <sub>2</sub> -C <sub>1</sub> -C <sub>2</sub>                 | 122.0     | 123.3                  | 121.8      | 121.6      | 121.4                  | 120.6                  | 121.1     |
| N <sub>1</sub> -C <sub>2</sub> -C <sub>3</sub>                 | 112.9     | 113.9                  | 114.7      | 114.9      | 110.2                  | 114.9                  | 112.4     |
| Dihedral angles (°)                                            |           |                        |            |            |                        |                        |           |
| O <sub>3</sub> -N <sub>2</sub> -C <sub>1</sub> -C <sub>2</sub> | 31.6      | 28.4                   | 35.1       | 39.3       | 33.9                   | 37.0                   | 29.8      |
| N <sub>2</sub> -C <sub>1</sub> -C <sub>2</sub> -C <sub>3</sub> | -99.7     | -116.2                 | -133.7     | 114.9      | -114.1                 | -126.8                 | -101.6    |



**Table S16** – Main structural parameters of the transition state issued from the HONO elimination mechanism (**TS2**) in 1,1,1-trinitrobutane (**-H**) and its analogues by substitution on carbon 3 (**-CH<sub>3</sub>**, **-Cl**, **-CN**, **-NH<sub>2</sub>**, **-NO<sub>2</sub>**, **-OH**).

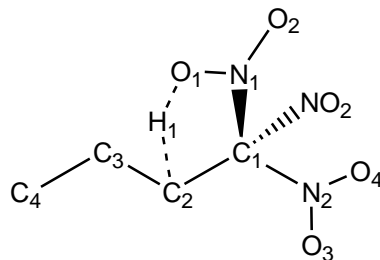

|                                                                | <b>-H</b> | <b>-CH<sub>3</sub></b> | <b>-Cl</b> | <b>-CN</b> | <b>-NH<sub>2</sub></b> | <b>-NO<sub>2</sub></b> | <b>OH</b> |
|----------------------------------------------------------------|-----------|------------------------|------------|------------|------------------------|------------------------|-----------|
| <b>Bond lengths (Å)</b>                                        |           |                        |            |            |                        |                        |           |
| N <sub>1</sub> -O <sub>1</sub>                                 | 1.257     | 1.257                  | 1.260      | 1.258      | 1.263                  | 1.254                  | 1.260     |
| N <sub>1</sub> -O <sub>2</sub>                                 | 1.190     | 1.190                  | 1.187      | 1.187      | 1.189                  | 1.187                  | 1.188     |
| N <sub>1</sub> -C <sub>1</sub>                                 | 2.096     | 2.098                  | 2.069      | 2.053      | 2.103                  | 2.004                  | 2.087     |
| C <sub>1</sub> -C <sub>2</sub>                                 | 1.386     | 1.387                  | 1.390      | 1.388      | 1.386                  | 1.390                  | 1.384     |
| C <sub>2</sub> -H <sub>1</sub>                                 | 1.388     | 1.380                  | 1.411      | 1.421      | 1.398                  | 1.438                  | 1.403     |
| <b>Angles (°)</b>                                              |           |                        |            |            |                        |                        |           |
| O <sub>1</sub> -N <sub>1</sub> -C <sub>1</sub>                 | 101.0     | 101.0                  | 101.7      | 101.9      | 100.8                  | 102.8                  | 101.1     |
| N <sub>1</sub> -O <sub>1</sub> -H <sub>1</sub>                 | 95.5      | 95.4                   | 95.7       | 96.0       | 95.6                   | 97.5                   | 95.9      |
| O <sub>2</sub> -N <sub>1</sub> -C <sub>1</sub>                 | 135.4     | 135.3                  | 134.6      | 134.1      | 136.3                  | 132.6                  | 135.5     |
| C <sub>1</sub> -C <sub>2</sub> -H <sub>1</sub>                 | 90.0      | 90.0                   | 89.9       | 89.7       | 90.2                   | 90.3                   | 90.1      |
| C <sub>1</sub> -C <sub>2</sub> -C <sub>3</sub>                 | 122.6     | 123.5                  | 123.4      | 122.0      | 121.3                  | 121.8                  | 121.7     |
| N <sub>2</sub> -C <sub>1</sub> -C <sub>2</sub>                 | 122.0     | 122.0                  | 120.8      | 121.3      | 120.1                  | 121.1                  | 122.4     |
| <b>Dihedral angles (°)</b>                                     |           |                        |            |            |                        |                        |           |
| O <sub>1</sub> -N <sub>1</sub> -C <sub>1</sub> -C <sub>2</sub> | 0.1       | -0.8                   | 1.3        | 0.1        | 0.1                    | -1.5                   | -2.9      |
| O <sub>3</sub> -N <sub>2</sub> -C <sub>1</sub> -C <sub>2</sub> | -10.4     | -8.9                   | -3.2       | -7.8       | -27.8                  | -9.7                   | -22.1     |
| N <sub>1</sub> -C <sub>1</sub> -C <sub>2</sub> -C <sub>3</sub> | 107.5     | 109.3                  | 105.0      | 109.2      | 107.2                  | 111.9                  | 112.1     |

**Table S17** – Main structural parameters of the product issued from the HONO elimination mechanism (**Prod1**) in 1,1,1-trinitrobutane (**-H**) and its analogues by substitution on carbon 3 (**-CH<sub>3</sub>**, **-Cl**, **-CN**, **-NH<sub>2</sub>**, **-NO<sub>2</sub>**, **-OH**).

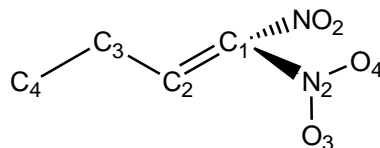

|                                                                | <b>-H</b> | <b>-CH<sub>3</sub></b> | <b>-Cl</b> | <b>-CN</b> | <b>-NH<sub>2</sub></b> | <b>-NO<sub>2</sub></b> | <b>OH</b> |
|----------------------------------------------------------------|-----------|------------------------|------------|------------|------------------------|------------------------|-----------|
| Bond lengths (Å)                                               |           |                        |            |            |                        |                        |           |
| N <sub>2</sub> -O <sub>3</sub>                                 | 1.219     | 1.219                  | 1.218      | 1.217      | 1.219                  | 1.217                  | 1.218     |
| N <sub>2</sub> -O <sub>4</sub>                                 | 1.217     | 1.217                  | 1.216      | 1.215      | 1.216                  | 1.215                  | 1.216     |
| N <sub>2</sub> -C <sub>1</sub>                                 | 1.461     | 1.460                  | 1.464      | 1.466      | 1.462                  | 1.468                  | 1.466     |
| C <sub>1</sub> -C <sub>2</sub>                                 | 1.331     | 1.330                  | 1.329      | 1.328      | 1.331                  | 1.330                  | 1.329     |
| Angles (°)                                                     |           |                        |            |            |                        |                        |           |
| O <sub>3</sub> -N <sub>2</sub> -C <sub>1</sub>                 | 117.0     | 117.0                  | 116.8      | 116.8      | 117.0                  | 116.7                  | 117.0     |
| O <sub>4</sub> -N <sub>2</sub> -C <sub>1</sub>                 | 116.7     | 116.7                  | 116.5      | 116.4      | 116.7                  | 116.3                  | 116.6     |
| N <sub>2</sub> -C <sub>1</sub> -C <sub>2</sub>                 | 122.4     | 122.6                  | 122.1      | 121.9      | 122.1                  | 121.3                  | 121.6     |
| N <sub>1</sub> -C <sub>2</sub> -C <sub>3</sub>                 | 127.3     | 127.4                  | 126.2      | 126.1      | 127.5                  | 126.1                  | 129.7     |
| Dihedral angles (°)                                            |           |                        |            |            |                        |                        |           |
| O <sub>3</sub> -N <sub>2</sub> -C <sub>1</sub> -C <sub>2</sub> | 13.2      | 12.4                   | 13.4       | 15.5       | 18.0                   | 23.3                   | 11.6      |
| N <sub>2</sub> -C <sub>1</sub> -C <sub>2</sub> -C <sub>3</sub> | 178.1     | 177.8                  | 178.9      | -180.0     | 177.8                  | 174.3                  | 178.7     |

**Table S18** – Main structural parameters of 1,1,1-trinitrobutane (-H) and its analogues by substitution on carbon 4 (-CH<sub>3</sub>, -Cl, -CN, -NH<sub>2</sub>, -NO<sub>2</sub>, -OH).

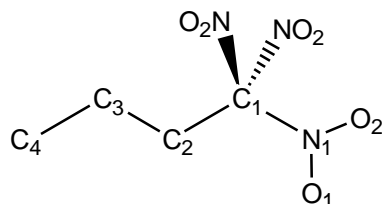

|                                                                | -H    | -CH <sub>3</sub> | -Cl   | -CN   | -NH <sub>2</sub> | -NO <sub>2</sub> | OH    |
|----------------------------------------------------------------|-------|------------------|-------|-------|------------------|------------------|-------|
| Bond lengths (Å)                                               |       |                  |       |       |                  |                  |       |
| N <sub>1</sub> -O <sub>1</sub>                                 | 1.213 | 1.213            | 1.213 | 1.213 | 1.213            | 1.213            | 1.214 |
| N <sub>1</sub> -O <sub>2</sub>                                 | 1.207 | 1.207            | 1.206 | 1.206 | 1.207            | 1.206            | 1.206 |
| N <sub>1</sub> -C <sub>1</sub>                                 | 1.532 | 1.532            | 1.533 | 1.533 | 1.533            | 1.532            | 1.532 |
| C <sub>1</sub> -C <sub>2</sub>                                 | 1.514 | 1.513            | 1.514 | 1.514 | 1.513            | 1.515            | 1.513 |
| Angles (°)                                                     |       |                  |       |       |                  |                  |       |
| O <sub>1</sub> -N <sub>1</sub> -C <sub>1</sub>                 | 113.8 | 113.8            | 113.8 | 113.9 | 113.9            | 113.8            | 113.8 |
| O <sub>2</sub> -N <sub>1</sub> -C <sub>1</sub>                 | 118.2 | 118.2            | 118.0 | 118.0 | 118.1            | 118.0            | 118.2 |
| N <sub>1</sub> -C <sub>1</sub> -C <sub>2</sub>                 | 111.2 | 111.2            | 110.9 | 110.8 | 111.1            | 110.9            | 111.1 |
| Dihedral angles (°)                                            |       |                  |       |       |                  |                  |       |
| O <sub>1</sub> -N <sub>1</sub> -C <sub>1</sub> -C <sub>2</sub> | 47.4  | 47.5             | 46.8  | 46.4  | 47.6             | 46.3             | 47.2  |

**Table S19** – Main structural parameters of the radical issued from the C-N breaking (**Rad1**) in 1,1,1-trinitrobutane (**-H**) and its analogues by substitution on carbon 4 (**-CH<sub>3</sub>**, **-Cl**, **-CN**, **-NH<sub>2</sub>**, **-NO<sub>2</sub>**, **-OH**).



|                                                                | <b>-H</b> | <b>-CH<sub>3</sub></b> | <b>-Cl</b> | <b>-CN</b> | <b>-NH<sub>2</sub></b> | <b>-NO<sub>2</sub></b> | <b>OH</b> |
|----------------------------------------------------------------|-----------|------------------------|------------|------------|------------------------|------------------------|-----------|
| Bond lengths (Å)                                               |           |                        |            |            |                        |                        |           |
| N <sub>2</sub> -O <sub>3</sub>                                 | 1.225     | 1.225                  | 1.225      | 1.225      | 1.226                  | 1.225                  | 1.225     |
| N <sub>2</sub> -O <sub>4</sub>                                 | 1.218     | 1.219                  | 1.218      | 1.217      | 1.220                  | 1.217                  | 1.219     |
| N <sub>2</sub> -C <sub>1</sub>                                 | 1.436     | 1.435                  | 1.436      | 1.437      | 1.433                  | 1.437                  | 1.435     |
| C <sub>1</sub> -C <sub>2</sub>                                 | 1.471     | 1.471                  | 1.472      | 1.474      | 1.471                  | 1.474                  | 1.472     |
| Angles (°)                                                     |           |                        |            |            |                        |                        |           |
| O <sub>3</sub> -N <sub>2</sub> -C <sub>1</sub>                 | 115.5     | 115.6                  | 115.4      | 115.2      | 115.5                  | 115.2                  | 115.5     |
| O <sub>4</sub> -N <sub>2</sub> -C <sub>1</sub>                 | 118.0     | 118.0                  | 118.0      | 118.0      | 118.1                  | 118.0                  | 118.0     |
| N <sub>2</sub> -C <sub>1</sub> -C <sub>2</sub>                 | 122.0     | 122.1                  | 121.8      | 121.6      | 122.2                  | 121.6                  | 122.2     |
| N <sub>1</sub> -C <sub>2</sub> -C <sub>3</sub>                 | 112.9     | 112.7                  | 112.3      | 112.6      | 112.5                  | 112.3                  | 112.5     |
| Dihedral angles (°)                                            |           |                        |            |            |                        |                        |           |
| O <sub>3</sub> -N <sub>2</sub> -C <sub>1</sub> -C <sub>2</sub> | 31.6      | 30.0                   | 31.5       | 34.2       | 25.1                   | 33.5                   | 28.6      |
| N <sub>2</sub> -C <sub>1</sub> -C <sub>2</sub> -C <sub>3</sub> | -99.7     | -99.9                  | -100.0     | -100.9     | -95.7                  | -100.6                 | -100.9    |

**Table S20**– Main structural parameters of the transition state issued from the HONO elimination mechanism (**TS2**) in 1,1,1-trinitrobutane (**-H**) and its analogues by substitution on carbon 4 (**-CH<sub>3</sub>**, **-Cl**, **-CN**, **-NH<sub>2</sub>**, **-NO<sub>2</sub>**, **-OH**).



|                                                                | <b>-H</b> | <b>-CH<sub>3</sub></b> | <b>-Cl</b> | <b>-CN</b> | <b>-NH<sub>2</sub></b> | <b>-NO<sub>2</sub></b> | <b>OH</b> |
|----------------------------------------------------------------|-----------|------------------------|------------|------------|------------------------|------------------------|-----------|
| <b>Bond lengths (Å)</b>                                        |           |                        |            |            |                        |                        |           |
| N <sub>1</sub> -O <sub>1</sub>                                 | 1.257     | 1.257                  | 1.259      | 1.260      | 1.258                  | 1.261                  | 1.258     |
| N <sub>1</sub> -O <sub>2</sub>                                 | 1.190     | 1.190                  | 1.188      | 1.187      | 1.189                  | 1.187                  | 1.189     |
| N <sub>1</sub> -C <sub>1</sub>                                 | 2.096     | 2.095                  | 2.081      | 2.077      | 2.092                  | 2.077                  | 2.090     |
| C <sub>1</sub> -C <sub>2</sub>                                 | 1.386     | 1.386                  | 1.387      | 1.387      | 1.386                  | 1.387                  | 1.386     |
| C <sub>2</sub> -H <sub>1</sub>                                 | 1.388     | 1.387                  | 1.405      | 1.410      | 1.391                  | 1.411                  | 1.394     |
| <b>Angles (°)</b>                                              |           |                        |            |            |                        |                        |           |
| O <sub>1</sub> -N <sub>1</sub> -C <sub>1</sub>                 | 101.0     | 101.0                  | 101.3      | 101.3      | 101.1                  | 101.4                  | 101.1     |
| N <sub>1</sub> -O <sub>1</sub> -H <sub>1</sub>                 | 95.5      | 95.5                   | 95.6       | 95.5       | 95.5                   | 95.5                   | 95.5      |
| O <sub>2</sub> -N <sub>1</sub> -C <sub>1</sub>                 | 135.4     | 135.3                  | 135.1      | 135.0      | 135.3                  | 135.0                  | 135.3     |
| C <sub>1</sub> -C <sub>2</sub> -H <sub>1</sub>                 | 90.0      | 90.0                   | 89.6       | 89.6       | 89.9                   | 89.5                   | 89.8      |
| C <sub>1</sub> -C <sub>2</sub> -C <sub>3</sub>                 | 122.6     | 122.6                  | 122.1      | 122.0      | 122.3                  | 121.9                  | 122.3     |
| N <sub>2</sub> -C <sub>1</sub> -C <sub>2</sub>                 | 122.0     | 121.9                  | 121.6      | 121.5      | 121.8                  | 121.5                  | 121.7     |
| <b>Dihedral angles (°)</b>                                     |           |                        |            |            |                        |                        |           |
| O <sub>1</sub> -N <sub>1</sub> -C <sub>1</sub> -C <sub>2</sub> | 0.1       | 0.1                    | 0.3        | 0.5        | 0.2                    | 0.3                    | 0.2       |
| O <sub>3</sub> -N <sub>2</sub> -C <sub>1</sub> -C <sub>2</sub> | -10.4     | -10.5                  | -10.1      | -9.7       | -11.1                  | -9.6                   | -10.4     |
| N <sub>1</sub> -C <sub>1</sub> -C <sub>2</sub> -C <sub>3</sub> | 107.5     | 107.4                  | 107.8      | 107.6      | 107.4                  | 108.0                  | 107.7     |

**Table S21** – Main structural parameters of the product issued from the HONO elimination mechanism (**Prod1**) in 1,1,1-trinitrobutane (**-H**) and its analogues by substitution on carbon 4 (**-CH<sub>3</sub>**, **-Cl**, **-CN**, **-NH<sub>2</sub>**, **-NO<sub>2</sub>**, **-OH**).

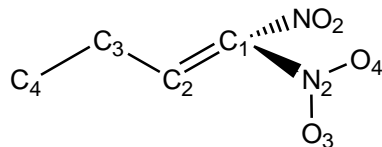

|                                                                | <b>-H</b> | <b>-CH<sub>3</sub></b> | <b>-Cl</b> | <b>-CN</b> | <b>-NH<sub>2</sub></b> | <b>-NO<sub>2</sub></b> | <b>OH</b> |
|----------------------------------------------------------------|-----------|------------------------|------------|------------|------------------------|------------------------|-----------|
| Bond lengths (Å)                                               |           |                        |            |            |                        |                        |           |
| N <sub>2</sub> -O <sub>3</sub>                                 | 1.219     | 1.219                  | 1.219      | 1.218      | 1.219                  | 1.218                  | 1.219     |
| N <sub>2</sub> -O <sub>4</sub>                                 | 1.217     | 1.217                  | 1.216      | 1.215      | 1.216                  | 1.215                  | 1.216     |
| N <sub>2</sub> -C <sub>1</sub>                                 | 1.461     | 1.460                  | 1.463      | 1.465      | 1.460                  | 1.464                  | 1.461     |
| C <sub>1</sub> -C <sub>2</sub>                                 | 1.331     | 1.331                  | 1.329      | 1.330      | 1.330                  | 1.330                  | 1.330     |
| Angles (°)                                                     |           |                        |            |            |                        |                        |           |
| O <sub>3</sub> -N <sub>2</sub> -C <sub>1</sub>                 | 117.0     | 117.0                  | 116.8      | 116.7      | 117.0                  | 116.8                  | 116.9     |
| O <sub>4</sub> -N <sub>2</sub> -C <sub>1</sub>                 | 116.7     | 116.7                  | 116.6      | 116.6      | 116.7                  | 116.6                  | 116.7     |
| N <sub>2</sub> -C <sub>1</sub> -C <sub>2</sub>                 | 122.4     | 122.5                  | 122.3      | 122.2      | 122.4                  | 122.0                  | 122.4     |
| N <sub>1</sub> -C <sub>2</sub> -C <sub>3</sub>                 | 127.3     | 127.2                  | 126.8      | 126.4      | 127.1                  | 126.9                  | 127.0     |
| Dihedral angles (°)                                            |           |                        |            |            |                        |                        |           |
| O <sub>3</sub> -N <sub>2</sub> -C <sub>1</sub> -C <sub>2</sub> | 13.2      | 12.3                   | 12.7       | 16.3       | 13.1                   | 13.9                   | 12.4      |
| N <sub>2</sub> -C <sub>1</sub> -C <sub>2</sub> -C <sub>3</sub> | 178.1     | 178.6                  | 177.6      | 176.8      | 177.7                  | 176.8                  | 177.4     |

**Annex S1** – XYZ structures for the stationary points and transition states along the decomposition mechanisms of 1,1,1-trinitrobutane

**S0**

|   |             |             |             |
|---|-------------|-------------|-------------|
| C | 0.00000000  | 0.00000000  | 0.00000000  |
| C | 0.00000000  | 0.00000000  | 1.52475504  |
| H | 1.02415246  | 0.00000000  | -0.38294629 |
| H | -0.50414379 | -0.88649235 | -0.39911471 |
| H | -0.50538692 | 0.88505713  | -0.40157551 |
| C | -1.43576014 | 0.02502967  | 2.05586480  |
| H | 0.52202454  | -0.88436612 | 1.89795609  |
| H | 0.54105396  | 0.88165590  | 1.88665989  |
| C | -1.59196085 | 0.00262548  | 3.56121167  |
| H | -1.93660905 | 0.93704488  | 1.71254404  |
| H | -2.01132614 | -0.82276852 | 1.67222332  |
| N | -3.01200423 | 0.39905704  | 3.97800391  |
| O | -3.88314177 | -0.16955934 | 3.35335635  |
| O | -3.14061811 | 1.20144798  | 4.86988517  |
| N | -0.62657910 | 0.96962061  | 4.23130317  |
| O | -0.69354243 | 2.10614016  | 3.81787591  |
| O | 0.13067367  | 0.52377434  | 5.06293360  |
| N | -1.37869892 | -1.37513507 | 4.19832788  |
| O | -1.94049717 | -1.56843182 | 5.25195919  |
| O | -0.66358870 | -2.14011204 | 3.59028282  |

**Rad1**

|   |             |             |             |
|---|-------------|-------------|-------------|
| C | 0.00000000  | 0.00000000  | 0.00000000  |
| C | 0.00000000  | 0.00000000  | 1.52219789  |
| H | 1.02459248  | 0.00000000  | -0.38318436 |
| H | -0.50457368 | -0.88655294 | -0.39850421 |
| H | -0.50590746 | 0.88555936  | -0.39915616 |
| C | -1.44294887 | 0.00093718  | 2.07729419  |
| H | 0.52125785  | -0.88309934 | 1.90603793  |
| H | 0.52905443  | 0.88338545  | 1.89802175  |
| C | -1.49125775 | 0.01921394  | 3.54766418  |
| H | -1.97136586 | 0.88964879  | 1.71465721  |
| H | -1.97021967 | -0.89230165 | 1.72994414  |
| N | -1.71703383 | -1.17227578 | 4.31687439  |
| O | -1.28529992 | -2.20755743 | 3.82472654  |
| O | -2.35404992 | -1.07274763 | 5.35080559  |
| N | -1.18654022 | 1.21098060  | 4.29274061  |
| O | -1.49442701 | 2.26677274  | 3.75408349  |
| O | -0.60782733 | 1.08557517  | 5.35899896  |

**TS1 a**

|   |             |             |             |
|---|-------------|-------------|-------------|
| C | 0.00000000  | 0.00000000  | 0.00000000  |
| C | 0.00000000  | 0.00000000  | 1.52431388  |
| H | 1.02315139  | 0.00000000  | -0.38527021 |
| H | -0.50718544 | -0.88477381 | -0.39887865 |
| H | -0.50615421 | 0.88583760  | -0.39808952 |
| C | -1.42706110 | 0.02289785  | 2.07041204  |
| H | 0.53016982  | -0.88678117 | 1.89223016  |
| H | 0.55235273  | 0.87163576  | 1.89192588  |
| C | -1.54696835 | -0.10846446 | 3.55505073  |
| H | -1.95572060 | 0.93586490  | 1.78395962  |
| H | -2.00131670 | -0.81788334 | 1.66072006  |
| N | -0.31117083 | 0.98547804  | 4.30685238  |
| O | -1.44783837 | 1.59097521  | 4.22115946  |
| O | 0.61395864  | 1.50721459  | 4.82924368  |
| N | -0.96081619 | -1.47039207 | 4.06034861  |
| O | -0.03213580 | -1.49230581 | 4.82207937  |
| O | -1.54720165 | -2.41033651 | 3.56106812  |
| N | -3.00933343 | -0.20006153 | 4.06563612  |
| O | -3.15146699 | -0.61529130 | 5.19387205  |
| O | -3.86282255 | 0.19766462  | 3.30685199  |

**TS1 b**

|   |             |             |             |
|---|-------------|-------------|-------------|
| C | 0.00000000  | 0.00000000  | 0.00000000  |
| C | 0.00000000  | 0.00000000  | 1.52437221  |
| H | 1.02515322  | 0.00000000  | -0.38045998 |
| H | -0.50343352 | -0.88672681 | -0.39903194 |
| H | -0.50461956 | 0.88505324  | -0.40263616 |
| C | -1.44111943 | 0.01734498  | 2.05055741  |
| H | 0.51823471  | -0.88725763 | 1.90003965  |
| H | 0.54900699  | 0.87436159  | 1.89061973  |
| C | -1.60173457 | -0.09899684 | 3.53727228  |
| H | -1.93325322 | 0.94901319  | 1.75065048  |
| H | -2.01032757 | -0.81210527 | 1.62180698  |
| N | -3.10164190 | 0.83433568  | 4.06204474  |
| O | -3.40593482 | -0.35739160 | 3.66285212  |
| O | -3.93330719 | 1.53897365  | 4.52251945  |
| N | -0.54622079 | 0.81059657  | 4.26743996  |
| O | -0.80693786 | 1.96693013  | 4.47102837  |
| O | 0.50586583  | 0.23469438  | 4.45379463  |
| N | -1.36269787 | -1.47658228 | 4.16103079  |
| O | -1.46735515 | -1.53496698 | 5.36486097  |
| O | -1.14409470 | -2.38308127 | 3.38784603  |



**LM1 a**

|   |             |             |             |
|---|-------------|-------------|-------------|
| C | 0.00000000  | 0.00000000  | 0.00000000  |
| C | 0.00000000  | 0.00000000  | 1.52419970  |
| H | 1.02278900  | 0.00000000  | -0.38757672 |
| H | -0.50699883 | -0.88528249 | -0.39923944 |
| H | -0.50681780 | 0.88538116  | -0.39864570 |
| C | -1.42543482 | -0.00467962 | 2.07398027  |
| H | 0.53636963  | -0.87754455 | 1.90004395  |
| H | 0.53180678  | 0.88515423  | 1.89086899  |
| C | -1.49124988 | -0.03490516 | 3.58855420  |
| H | -1.97763948 | 0.87500305  | 1.72949237  |
| H | -1.95944267 | -0.89976203 | 1.73558368  |
| N | -2.99565840 | -0.10037341 | 4.00265270  |
| O | -3.48317651 | -1.20966253 | 3.98803293  |
| O | -3.55653632 | 0.94602427  | 4.24171793  |
| N | -0.98956271 | 1.30412211  | 4.21508855  |
| O | -1.03027988 | 2.29476500  | 3.52098791  |
| O | -0.57809720 | 1.23027810  | 5.35569801  |
| N | -1.16147685 | -1.31235414 | 5.61235090  |
| O | -0.42193733 | -2.06507885 | 6.04646313  |
| O | -0.79827531 | -1.06419898 | 4.10474185  |

**LM1 b**

|   |             |             |             |
|---|-------------|-------------|-------------|
| C | 0.00000000  | 0.00000000  | 0.00000000  |
| C | 0.00000000  | 0.00000000  | 1.52439704  |
| H | 1.02310401  | 0.00000000  | -0.38640535 |
| H | -0.50517270 | -0.88689992 | -0.39762605 |
| H | -0.50748968 | 0.88398131  | -0.40203323 |
| C | -1.43000935 | 0.03178933  | 2.06299416  |
| H | 0.52043669  | -0.88561643 | 1.89849345  |
| H | 0.55120284  | 0.87683450  | 1.88516692  |
| C | -1.60845475 | -0.02393306 | 3.57280458  |
| H | -1.92642409 | 0.95923190  | 1.75787434  |
| H | -2.01219706 | -0.80059527 | 1.65371987  |
| N | -2.94482172 | 0.72794435  | 5.44956614  |
| O | -2.84772319 | 0.37645409  | 3.92159234  |
| O | -4.04461425 | 0.85892323  | 5.72431603  |
| N | -0.51568883 | 0.85365459  | 4.24305815  |
| O | -0.73339091 | 2.04570165  | 4.22785723  |
| O | 0.47791263  | 0.29177512  | 4.64869144  |
| N | -1.36241681 | -1.44765469 | 4.15821377  |
| O | -1.78777730 | -1.63115022 | 5.28050331  |
| O | -0.80853323 | -2.25992334 | 3.45130621  |

**Rad2 a**

|   |             |             |             |
|---|-------------|-------------|-------------|
| C | 0.00000000  | 0.00000000  | 0.00000000  |
| C | 0.00000000  | 0.00000000  | 1.52562238  |
| H | 1.02443902  | 0.00000000  | -0.38264774 |
| H | -0.50621417 | -0.88491367 | -0.39980576 |
| H | -0.50444274 | 0.88605030  | -0.39997422 |
| C | -1.42769651 | 0.00188733  | 2.05562614  |
| H | 0.53476986  | -0.87776335 | 1.90275545  |
| H | 0.54208213  | 0.88037576  | 1.88982477  |
| C | -1.51851403 | 0.05179725  | 3.60178264  |
| H | -1.98747408 | 0.88287821  | 1.72012167  |
| H | -1.97755555 | -0.89219862 | 1.75267397  |
| N | -3.02733011 | 0.19083636  | 4.05424515  |
| O | -3.87088974 | -0.21097671 | 3.28631706  |
| O | -3.18425530 | 0.61719636  | 5.17522874  |
| N | -0.86352039 | 1.41045112  | 4.06635246  |
| O | -1.44328572 | 2.40829949  | 3.69179126  |
| O | 0.16014967  | 1.33339313  | 4.69699593  |
| O | -0.98376216 | -0.98167653 | 4.15057152  |

**Rad2 b**

|   |             |             |             |
|---|-------------|-------------|-------------|
| C | 0.00000000  | 0.00000000  | 0.00000000  |
| C | 0.00000000  | 0.00000000  | 1.52619416  |
| H | 1.02787129  | 0.00000000  | -0.37465423 |
| H | -0.50063238 | -0.88805204 | -0.39897770 |
| H | -0.50266648 | 0.88505043  | -0.40445003 |
| C | -1.44081583 | 0.03647440  | 2.03468519  |
| H | 0.50849924  | -0.89231264 | 1.90045255  |
| H | 0.55177021  | 0.87164874  | 1.89391834  |
| C | -1.60969136 | -0.13979682 | 3.56731135  |
| H | -1.91867471 | 0.98875778  | 1.78527988  |
| H | -2.03368501 | -0.77223315 | 1.59823984  |
| O | -2.80618292 | 0.20867181  | 3.91271160  |
| N | -0.50985996 | 0.74129876  | 4.28099121  |
| O | -0.80865400 | 1.89530347  | 4.46192572  |
| O | 0.54082453  | 0.18820873  | 4.51623592  |
| N | -1.31343545 | -1.60254368 | 4.03941948  |
| O | -1.43902915 | -1.77943590 | 5.23020766  |
| O | -1.05936482 | -2.43323049 | 3.19388917  |

**TS2 a**

|   |             |             |             |
|---|-------------|-------------|-------------|
| C | 0.00000000  | 0.00000000  | 0.00000000  |
| C | 0.00000000  | 0.00000000  | 1.52487595  |
| H | 1.02402159  | 0.00000000  | -0.38293485 |
| H | -0.50479203 | -0.88668055 | -0.39745945 |
| H | -0.50570618 | 0.88427257  | -0.40177408 |
| C | -1.40709453 | -0.06156803 | 2.09236252  |
| H | 0.56086454  | -0.86909092 | 1.89391762  |
| H | 0.52024574  | 0.88976307  | 1.89627988  |
| C | -1.69857467 | 0.28209751  | 3.40325667  |
| H | -2.03898652 | 1.09135062  | 1.64886167  |
| H | -2.07505404 | -0.82900201 | 1.69558310  |
| N | -2.85098939 | -0.30175868 | 4.13035644  |
| O | -2.93779173 | -0.04869471 | 5.31315510  |
| O | -3.63684531 | -0.94388098 | 3.45797102  |
| N | -2.67479018 | 2.10282959  | 3.05103256  |
| O | -2.61535702 | 2.16861082  | 1.79686848  |
| O | -3.18527284 | 2.93483951  | 3.73098190  |
| N | -0.61563628 | 0.72756210  | 4.30943611  |
| O | -0.24164442 | 1.87947486  | 4.23744444  |
| O | -0.14362160 | -0.15938646 | 4.99191761  |

**TS2 b**

|   |             |             |             |
|---|-------------|-------------|-------------|
| C | 0.00000000  | 0.00000000  | 0.00000000  |
| C | 0.00000000  | 0.00000000  | 1.52545036  |
| H | 1.02354705  | 0.00000000  | -0.38419505 |
| H | -0.50717647 | -0.88615927 | -0.39523739 |
| H | -0.50482217 | 0.88636887  | -0.39905656 |
| C | -1.38488117 | 0.01888120  | 2.08293497  |
| H | 0.55024230  | -0.86427126 | 1.91288538  |
| H | 0.55416660  | 0.88148102  | 1.89160042  |
| C | -1.67008259 | -0.03993951 | 3.46995539  |
| H | -2.12101140 | 0.58493064  | 1.50896003  |
| H | -3.12084518 | -0.96224542 | 2.10565456  |
| N | -3.13292728 | 0.00512664  | 3.64568478  |
| O | -3.83106223 | -0.68894454 | 2.75657173  |
| O | -3.69494414 | 0.49469763  | 4.57483161  |
| N | -1.20382303 | 1.27550097  | 4.44691336  |
| O | -1.27489388 | 2.34240539  | 3.88131290  |
| O | -0.79923529 | 1.04477080  | 5.56091965  |
| N | -1.04057742 | -1.20452522 | 4.25831484  |
| O | -1.82134080 | -1.94832243 | 4.82253111  |
| O | 0.16063280  | -1.33170911 | 4.16598885  |

**Prod 1**

|   |             |             |             |
|---|-------------|-------------|-------------|
| C | 0.00000000  | 0.00000000  | 0.00000000  |
| C | 0.00000000  | 0.00000000  | 1.53090881  |
| H | 1.02726035  | 0.00000000  | -0.37379948 |
| H | -0.50355955 | -0.88667767 | -0.39570060 |
| H | -0.50448401 | 0.88474827  | -0.40118185 |
| C | -1.38216951 | 0.06859636  | 2.07793456  |
| H | 0.54071587  | -0.86385322 | 1.92550403  |
| H | 0.53253208  | 0.89044536  | 1.89396614  |
| C | -1.93372450 | -0.73897995 | 2.98044951  |
| H | -2.04398575 | 0.84702889  | 1.70051065  |
| N | -3.29556190 | -0.54861553 | 3.47344615  |
| O | -4.00405166 | 0.22682841  | 2.85448151  |
| O | -3.60012092 | -1.15047791 | 4.48581287  |
| N | -1.24864928 | -1.89310418 | 3.56490005  |
| O | -0.21345994 | -1.67396106 | 4.16973022  |
| O | -1.74978355 | -2.98020660 | 3.35438509  |

**S0'**

|   |             |             |             |
|---|-------------|-------------|-------------|
| C | 0.00000000  | 0.00000000  | 0.00000000  |
| C | 0.00000000  | 0.00000000  | 1.52362830  |
| H | 1.02955639  | 0.00000000  | -0.36889673 |
| H | -0.50083746 | -0.88382766 | -0.40770517 |
| H | -0.48414148 | 0.89054231  | -0.41156002 |
| C | -1.35696172 | -0.20252793 | 2.20684024  |
| H | 0.61741304  | -0.83134091 | 1.88435206  |
| H | 0.47224606  | 0.91334202  | 1.89691655  |
| C | -2.46513282 | 0.79957416  | 1.96181458  |
| H | -1.78554524 | -1.16747543 | 1.91305683  |
| H | -1.22736067 | -0.23197947 | 3.29295452  |
| N | -3.70073808 | 0.47323295  | 2.83026963  |
| O | -3.47261447 | -0.01404467 | 3.91368014  |
| O | -4.77791054 | 0.74765522  | 2.35414266  |
| N | -2.99698348 | 0.78333346  | 0.52616164  |
| O | -3.18920309 | -0.32887933 | 0.08311130  |
| O | -3.20177609 | 1.84285299  | -0.01531884 |
| N | -2.07359931 | 2.22910274  | 2.30467064  |
| O | -2.69411152 | 2.78098000  | 3.18648034  |
| O | -1.14108179 | 2.66944991  | 1.66948046  |

**TS3**

|   |             |             |             |
|---|-------------|-------------|-------------|
| C | 0.00000000  | 0.00000000  | 0.00000000  |
| C | 0.00000000  | 0.00000000  | 1.49174372  |
| H | 0.95969888  | 0.00000000  | -0.51407075 |
| H | -0.79114083 | -0.52450486 | -0.52360677 |
| H | 0.41227487  | 1.77495417  | 0.10408615  |
| C | -0.94821632 | 0.96444958  | 2.31169104  |
| H | -0.29808694 | -1.00871307 | 1.81294003  |
| H | 1.01505509  | 0.17655198  | 1.85036612  |
| C | -1.47759455 | 2.17801462  | 1.58488410  |
| H | -1.83379401 | 0.42131716  | 2.65022857  |
| H | -0.40699733 | 1.31097698  | 3.19345739  |
| N | -2.53087727 | 2.94996670  | 2.38174243  |
| O | -2.23258186 | 3.14644213  | 3.54416521  |
| O | -3.53391651 | 3.29144794  | 1.80653344  |
| N | -2.18029866 | 1.61211254  | 0.28949162  |
| O | -2.98215012 | 0.70534916  | 0.46725627  |
| O | -1.37903929 | 1.65221731  | -0.67233068 |
| N | -0.49342238 | 3.09200695  | 1.14218800  |
| O | -0.79376846 | 4.22371180  | 0.77658330  |
| O | 0.65586433  | 2.52157102  | 0.79321339  |

**Prod2**

|   |             |             |             |
|---|-------------|-------------|-------------|
| C | 0.00000000  | 0.00000000  | 0.00000000  |
| C | 0.00000000  | 0.00000000  | 1.49636263  |
| H | 0.99350826  | 0.00000000  | -0.45854639 |
| H | -0.62008031 | -0.74565259 | -0.48996396 |
| C | -1.36368121 | 0.12403881  | 2.19255004  |
| H | 0.47737434  | -0.93897318 | 1.81235737  |
| H | 0.62722061  | 0.83108137  | 1.83908508  |
| C | -2.64320833 | 0.26071145  | 1.39378852  |
| H | -1.52904571 | -0.75264081 | 2.83707212  |
| H | -1.33832293 | 1.00454436  | 2.84186048  |
| N | -3.84721419 | 0.07383632  | 2.27926370  |
| O | -3.77302318 | 0.63955572  | 3.35544377  |
| O | -4.78757498 | -0.55973942 | 1.85314950  |
| N | -2.81846967 | -0.67826230 | 0.22467162  |
| O | -2.62964173 | -1.85335752 | 0.47354362  |
| O | -2.99125639 | -0.19203215 | -0.87103481 |

**Rad3 a**

|   |             |             |             |
|---|-------------|-------------|-------------|
| C | 0.00000000  | 0.00000000  | 0.00000000  |
| C | 0.00000000  | 0.00000000  | 1.52419464  |
| H | 1.02300104  | 0.00000000  | -0.38636491 |
| H | -0.50549873 | -0.88735348 | -0.39580981 |
| H | -0.50776242 | 0.88360488  | -0.40209843 |
| C | -1.43367067 | 0.02108255  | 2.06272118  |
| H | 0.52143079  | -0.88639070 | 1.89627775  |
| H | 0.54681689  | 0.87770190  | 1.88835844  |
| C | -1.55931796 | -0.04872563 | 3.57079743  |
| H | -1.92522553 | 0.95150254  | 1.75390495  |
| H | -2.02108289 | -0.80618974 | 1.65150516  |
| N | -2.94304525 | 0.38667722  | 4.01574456  |
| O | -3.86534156 | -0.23198263 | 3.52776610  |
| O | -3.00831162 | 1.31039778  | 4.79764878  |
| N | -0.59482853 | 0.96805998  | 4.19131963  |
| O | 0.22819521  | 0.50205308  | 4.90723901  |
| N | -1.35779987 | -1.41706137 | 4.16554337  |
| O | -1.72608420 | -1.54900151 | 5.31514745  |
| O | -0.77631374 | -2.23791596 | 3.48470487  |

**Rad3 b**

|   |             |             |             |
|---|-------------|-------------|-------------|
| C | 0.00000000  | 0.00000000  | 0.00000000  |
| C | 0.00000000  | 0.00000000  | 1.52424445  |
| H | 1.02383412  | 0.00000000  | -0.38442189 |
| H | -0.50419061 | -0.88640440 | -0.39995886 |
| H | -0.50566563 | 0.88512397  | -0.40138813 |
| C | -1.43253376 | 0.01846367  | 2.06394238  |
| H | 0.52363264  | -0.88234921 | 1.90057554  |
| H | 0.53567479  | 0.88308914  | 1.88971233  |
| C | -1.59083837 | 0.01980584  | 3.56880626  |
| H | -1.94912477 | 0.91664038  | 1.70296254  |
| H | -1.99719849 | -0.84538792 | 1.69505334  |
| N | -3.10232676 | 0.29856871  | 3.85832085  |
| O | -3.33271114 | 1.31114171  | 4.41762116  |
| N | -0.72569832 | 1.02513833  | 4.25420866  |
| O | -0.78272257 | 2.13796000  | 3.76607318  |
| O | -0.10422346 | 0.68890165  | 5.24196856  |
| N | -1.37489476 | -1.32112510 | 4.23063390  |
| O | -2.04334194 | -1.51619276 | 5.22648730  |
| O | -0.58556662 | -2.08742932 | 3.72077441  |

**Rad4**

|   |             |             |             |
|---|-------------|-------------|-------------|
| C | 0.00000000  | 0.00000000  | 0.00000000  |
| C | 0.00000000  | 0.00000000  | 1.48817710  |
| C | 1.41445322  | 0.00000000  | 2.09340145  |
| H | 0.08030572  | 0.92858717  | -0.55714883 |
| H | 0.08011519  | -0.92863384 | -0.55706900 |
| H | -0.53964708 | -0.88010476 | 1.86108187  |
| H | -0.53969617 | 0.88004924  | 1.86115081  |
| H | 1.97676762  | -0.88382467 | 1.77537542  |
| H | 1.36904842  | -0.00079871 | 3.18810569  |
| H | 1.97632929  | 0.88454127  | 1.77661184  |
